# Supplementary material for: Photocatalytic methanol oxidation to formaldehyde in a continuous laboratory plant over Aeroxide P25
Source: Royal Society of Chemistry journal article supplement (doi:10.1039/d3re00503h), 2024-01-01
Supplement: d3re00503h1.pdf [file d3re00503h1.pdf]

# Investigations on the photocatalytic Methanol Oxidation to yield formaldehyde in a continuous laboratory plant

## Supporting Informations

Stubenrauch, Florian<sup>1</sup>; Schörner, Markus<sup>1</sup>; Andreas, Bösmann<sup>2</sup>; Schühle, Patrick<sup>2</sup>;  
Wasserscheid, Peter<sup>1,2</sup>

<sup>1</sup>Forschungszentrum Jülich GmbH, Helmholtz-Institut Erlangen-Nürnberg for renewable Energy (IEK-11)

<sup>2</sup>Lehrstuhl für chemische Reaktionstechnik, Friedrich-Alexander-Universität Erlangen-Nürnberg

### 1. Continuous laboratory plant flow chart

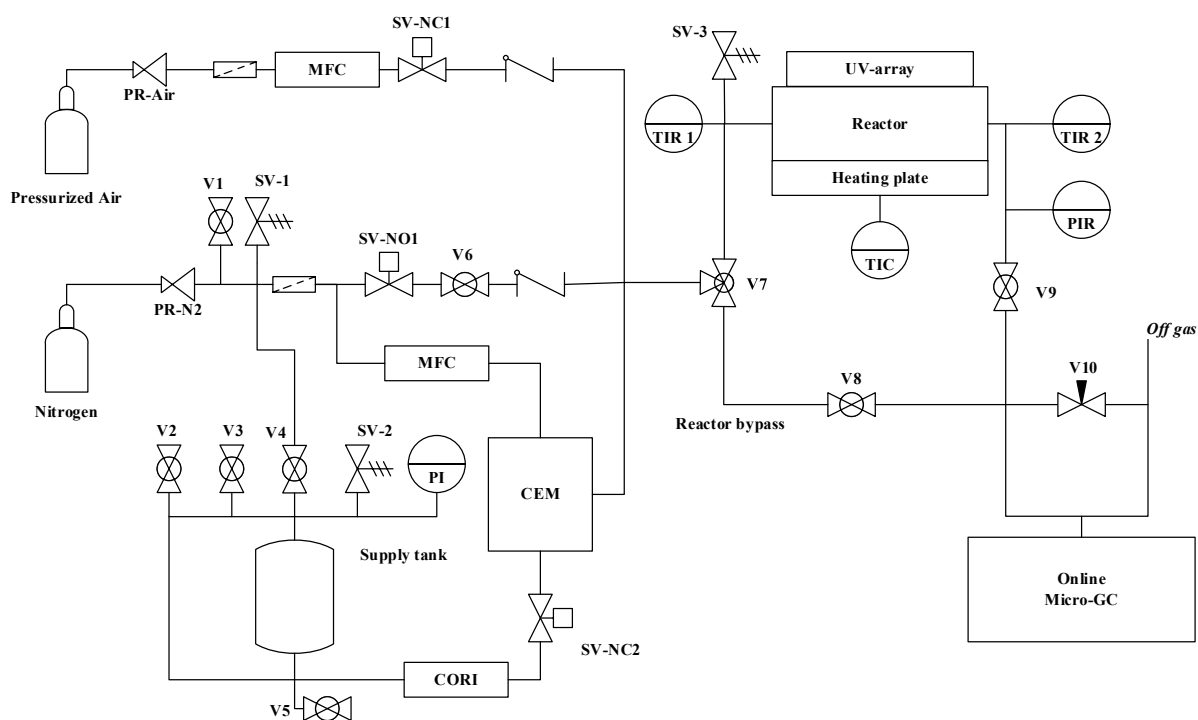

Figure S1: PI-flow diagram of the laboratory plant used in this study.

## 2. Gas chromatography setup details: Inficon Micro-GC Fusion

| Module | Injector           | Column                          | Carrier gas | Detector | Substances                                               |
|--------|--------------------|---------------------------------|-------------|----------|----------------------------------------------------------|
| A      | Backflush          | Rt-Molsieve<br>0.25 mm<br>10 m  | Ar          | TCD      | H <sub>2</sub> , O <sub>2</sub> , N <sub>2</sub> ,<br>CO |
| B      | Variable<br>Volume | Rt-U-Bond<br>0.25 mm<br>8 m     | He          | TCD      | CO <sub>2</sub> , HCHO,<br>H <sub>2</sub> O              |
| C      | Large<br>Volume    | Stabilwax DB<br>0.25 mm<br>10 m | He          | TCD      | DMM, DME,<br>MF, MeOH,<br>HeFal                          |

## 3. UV-irradiance and local intensity

Tabelle S1: Second degree polynomial fit equation in x and y direction for irradiance in the reactor with determined parameters.

| $p_{20}x^2 + p_{10}x + p_{02}y^2 + p_{01}y + p_{11}xy + p_{00}$ |             | Goodness of fit     |        |
|-----------------------------------------------------------------|-------------|---------------------|--------|
| p20                                                             | -9.324 E-03 | SSE:                | 601.4  |
| p10                                                             | 1.442       | R <sup>2</sup>      | 0.9531 |
| p02                                                             | -4.464 E-02 | Adj. R <sup>2</sup> | 0.9374 |
| p01                                                             | 3.585       | RMSE                | 6.332  |
| p11                                                             | -3.078 E-04 |                     |        |
| p00                                                             | 1.066 E+02  |                     |        |

## 4. Long term experiment course: Products

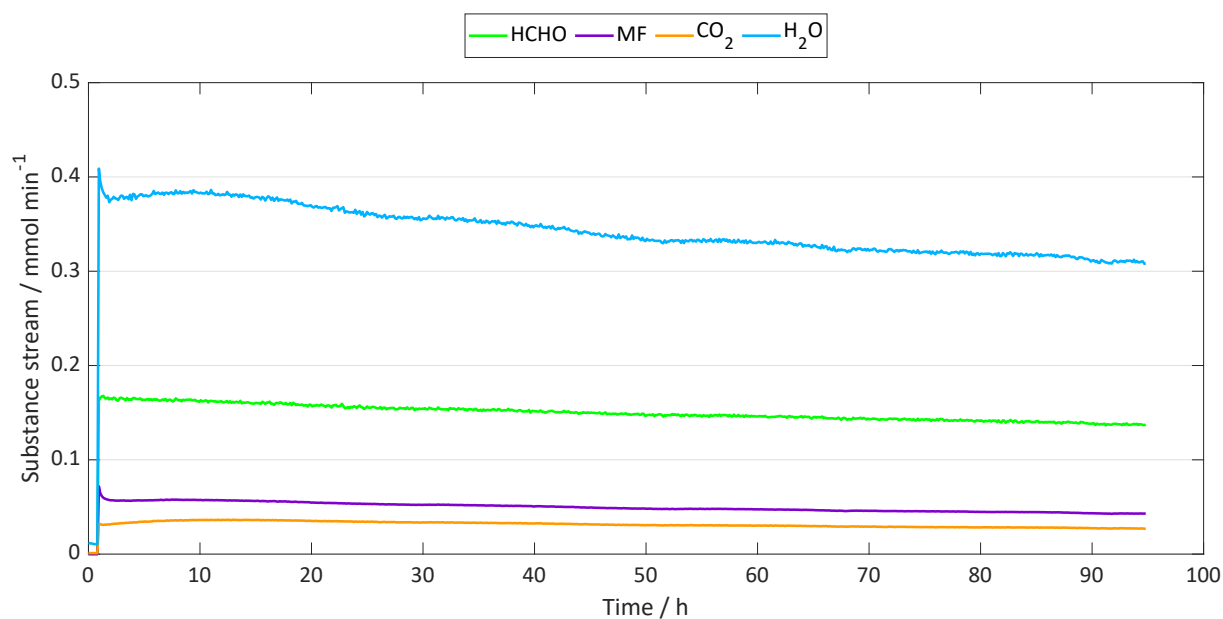

Figure S2: Conversion over time in a standard experiment.  $m_{Catalyst} = 0.1561$  g;  $\omega_{Catalyst} = 1.1478$  mg cm<sup>-2</sup>;  $T = 78$  °C;  $\tau = 11.8$  s;  $E = 186.8$  mW cm<sup>-2</sup>

## 5. Conversion of oxygen and product yields at different loadings and irradiations

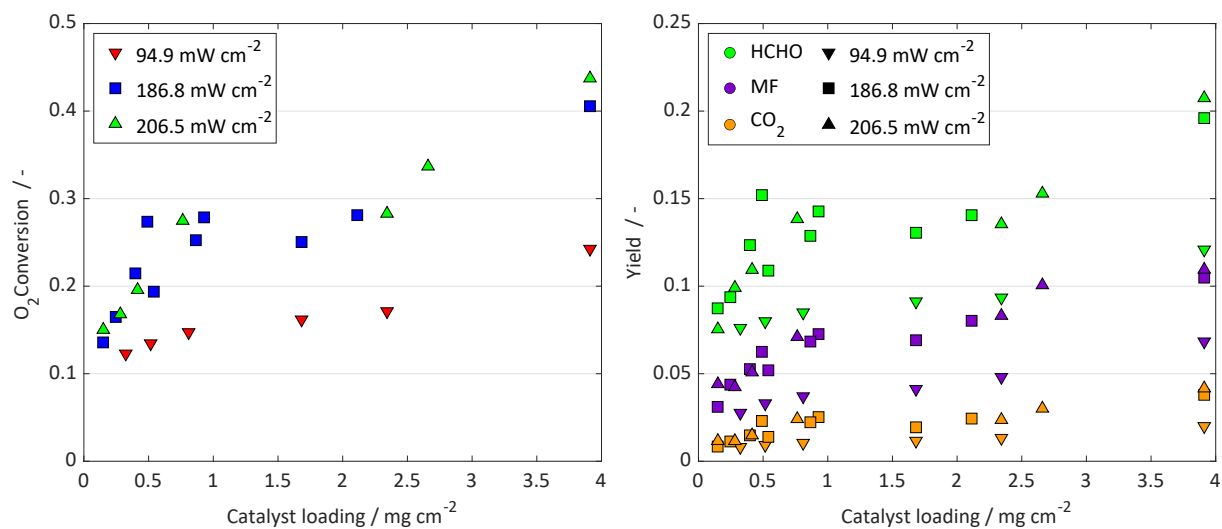

**Figure S3:** Resulting conversion of  $O_2$  (left) and yields (right) towards HCHO, MF and  $CO_2$  for different catalyst loads on the irradiated area.  $T = 78\ ^\circ C$ ,  $\tau = 11.8\ s$

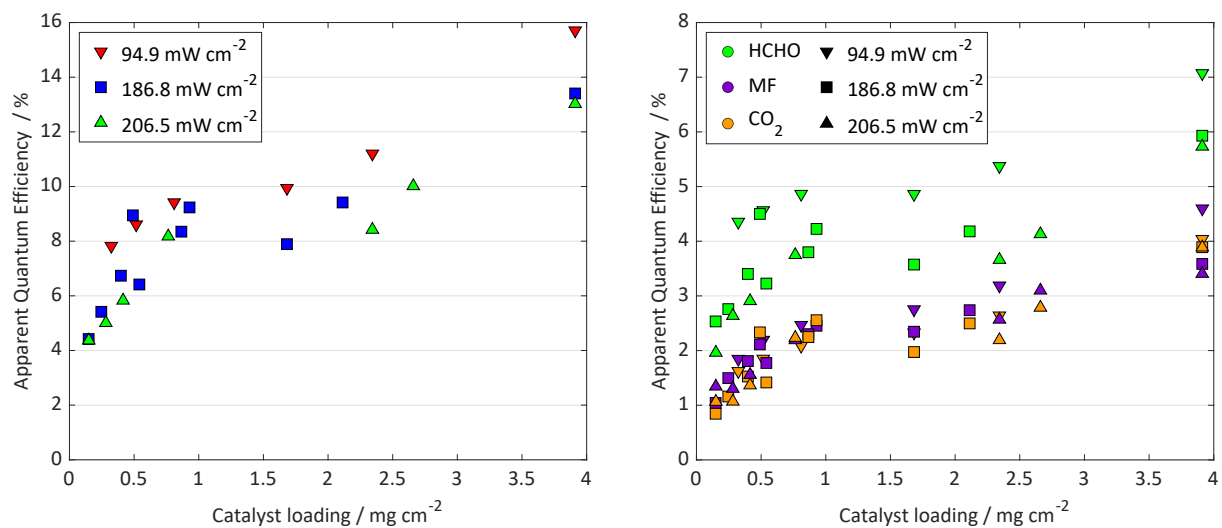

**Figure S4:** Apparent quantum efficiencies in total (left) and broken down to product species (right).  $T = 78\ ^\circ C$ ,  $\tau = 11.8\ s$

## 6. Residence Time influence: Yields and AQE

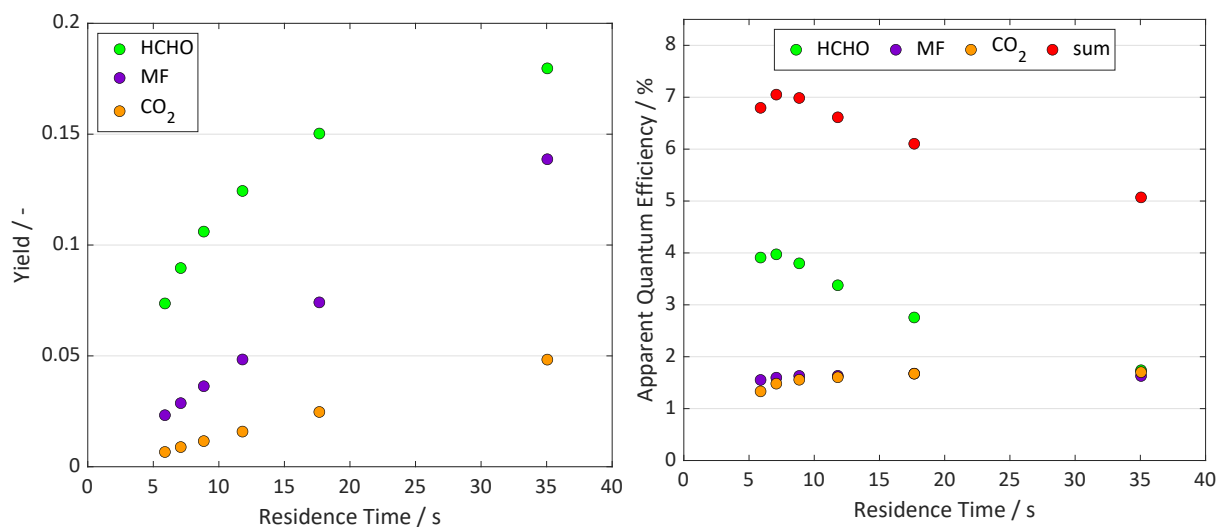

Figure S5: Yield (left) and AQE (right) at different residence times.  $m_{Catalyst} = 0.0465 \text{ g}$ ;  $\omega_{Catalyst} = 0.3419 \text{ mg cm}^{-2}$ ;  $T = 78 \text{ }^\circ\text{C}$ ;  $E = 186.8 \text{ mW cm}^{-2}$

## 7. Irradiance Influence: Yields and AQE

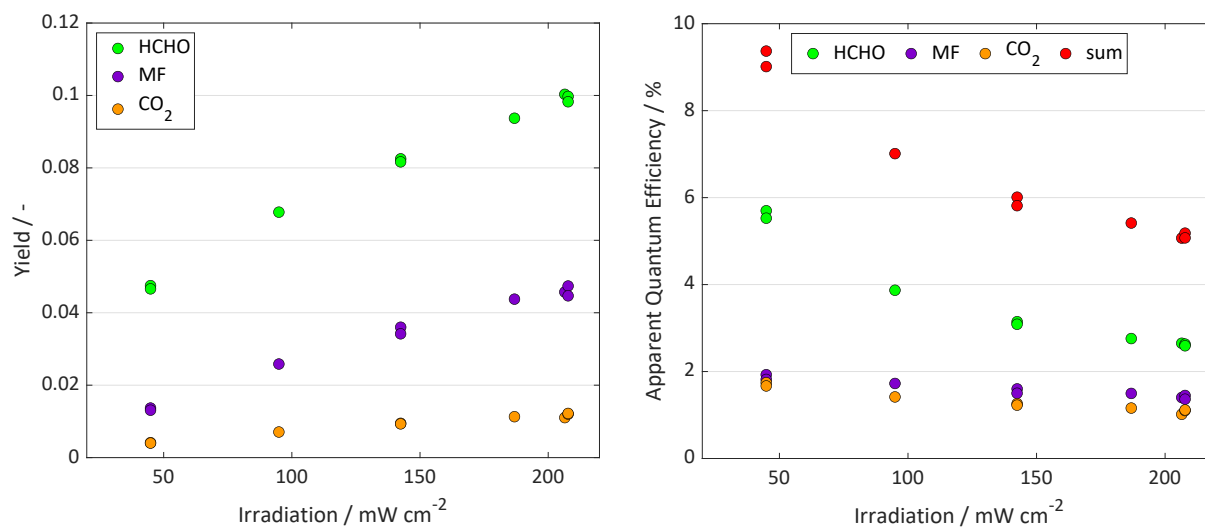

Figure S6: Yields (left) and AQE (right) for different irradiation intensities.  $m_{Catalyst} = 0.0335 \text{ g}$ ;  $\omega = 0.2463 \text{ mg cm}^{-2}$ ;  $T = 78 \text{ }^\circ\text{C}$ ;  $\tau = 11.8 \text{ s}$

## 8. Temperature influence: Yields and AQE

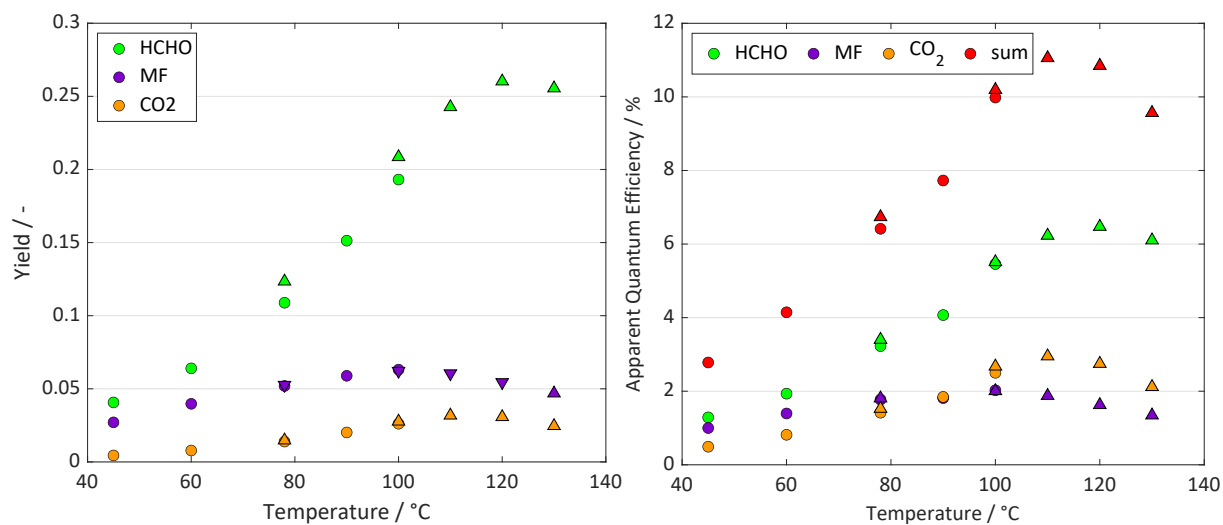

**Figure S7:** Yield towards product species (left) and AQE for product species and in total at different temperatures.  $m_{Catalyst} = 0.0735$  g (circles) /  $0.0541$  g (triangles);  $\omega_{Catalyst} = 0.5404$  mg cm<sup>-2</sup> /  $0.3978$  mg cm<sup>-2</sup>;  $\tau = 11.8$  s;  $E = 186.8$  mW cm<sup>-2</sup>

## 9. Temperature Variation: Reproduction experiment

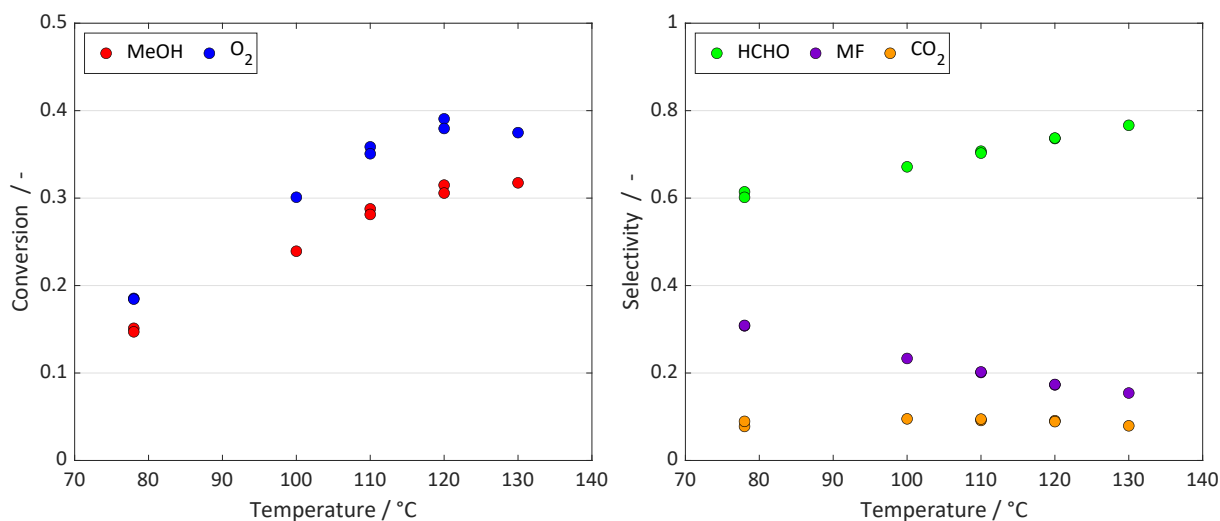

Figure S8: Conversion of MeOH and O<sub>2</sub> and product selectivities for different temperatures.  $m_{\text{Catalyst}} = 0.0484 \text{ g}$ ;  $\omega_{\text{Catalyst}} = 0.3559 \text{ mg cm}^{-2}$ ;  $\tau = 11.8 \text{ s}$ ;  $E = 186.8 \text{ mW cm}^{-2}$

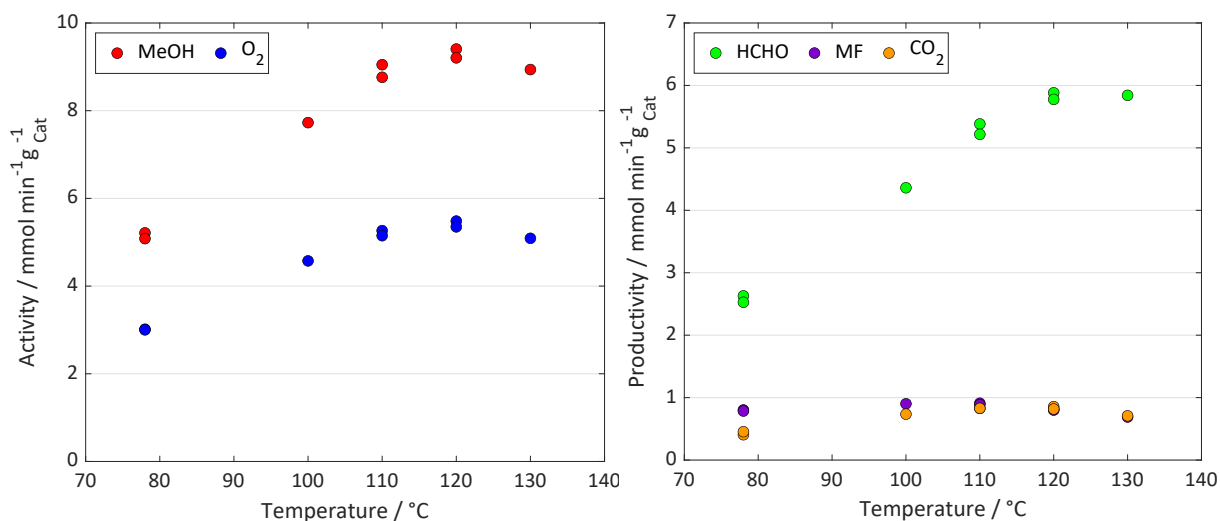

Figure S9: Catalyst activities (MeOH and O<sub>2</sub> consumption rates, left) and productivities (right) for different temperatures.  $m_{\text{Catalyst}} = 0.0484 \text{ g}$ ;  $\omega_{\text{Catalyst}} = 0.3559 \text{ mg cm}^{-2}$ ;  $\tau = 11.8 \text{ s}$ ;  $E = 186.8 \text{ mW cm}^{-2}$

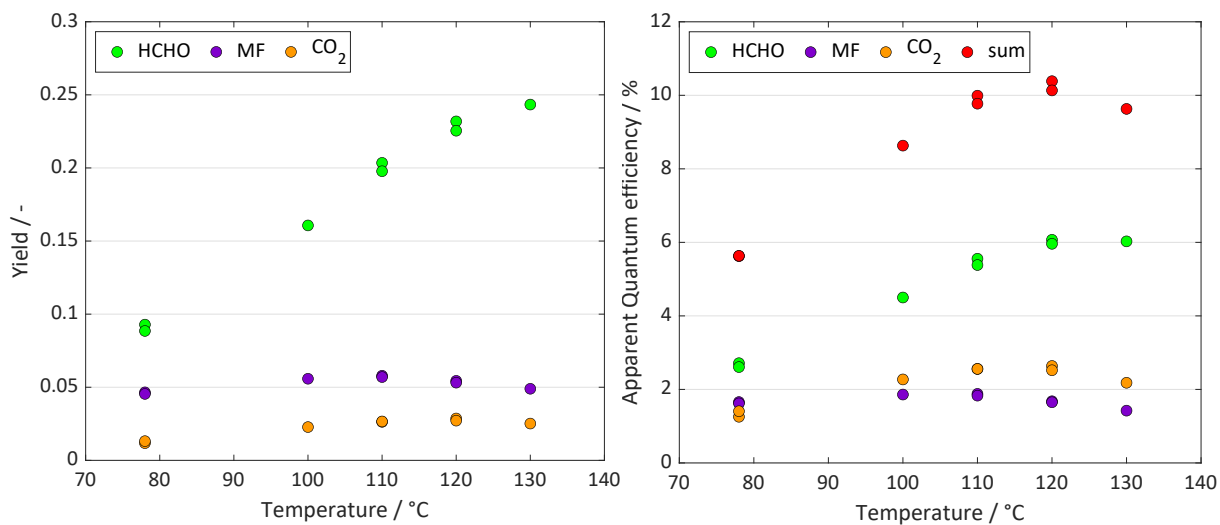

Figure S10: Yield towards products (left) and apparent quantum efficiencies (right) for different temperatures.  $m_{\text{Catalyst}} = 0.0484 \text{ g}$ ;  $\omega_{\text{Catalyst}} = 0.3559 \text{ mg cm}^{-2}$ ;  $\tau = 11.8 \text{ s}$ ;  $E = 186.8 \text{ mW cm}^{-2}$
